# Supplementary material
Source: PubMed Central journal article supplement (PMC3486044)
Supplement: IAI.00422-12_zii999099852so1.pdf [file IAI.00422-12_zii999099852so1.pdf]

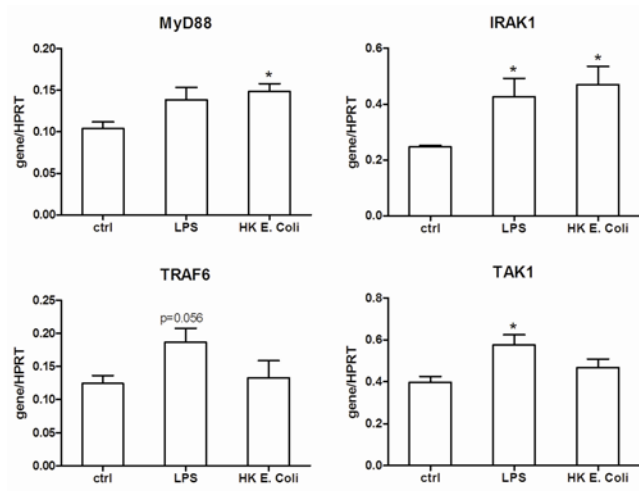

**Fig. S1 TLR4 downstream signaling pathway in tubular epithelial cells.**

TLR4-mediated MyD88, IRAK1, TRAF6 and TAK1 mRNA expression was induced by LPS or heat-killed (HK) uropathogenic *E. coli*. The expression levels of mRNA was evaluated by RT-PCR. Data are mean  $\pm$  SEM (n= 5 per group). \*P < 0.05.
